# Supplementary material for: Serum miRNA Signature in Rheumatoid Arthritis and “At-Risk Individuals”
Source: PubMed Central journal article supplement (PMC7966707; doi:10.3389/fimmu.2021.633201), 2021-03-03

# Supplementary Figure 1

## Combined ROC Curves (2 miRNA) – Arth v HC

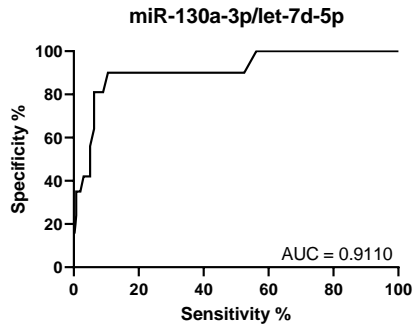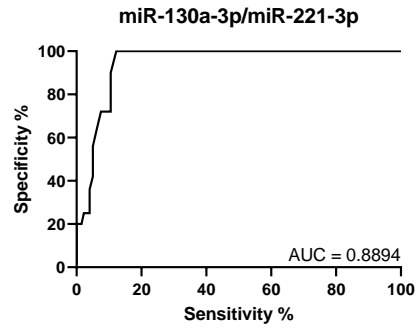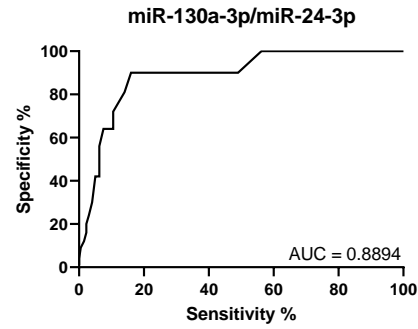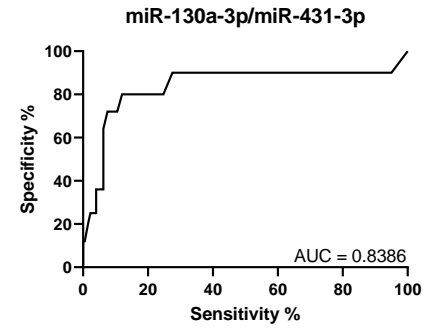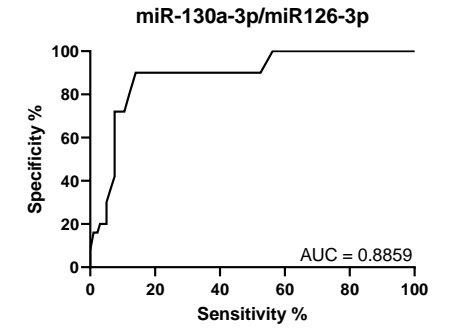

## Combined ROC Curves (3 miRNA) – Arth v HC

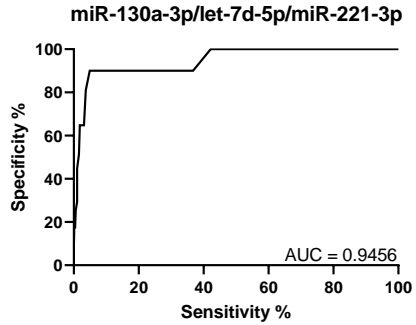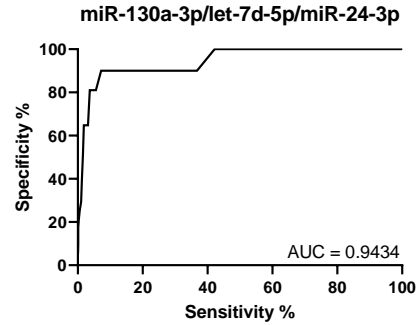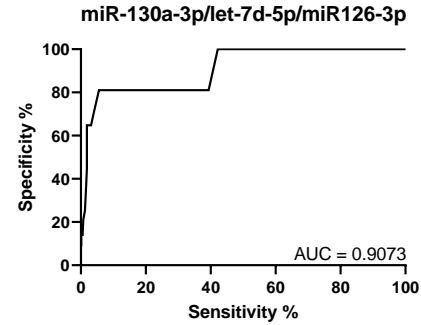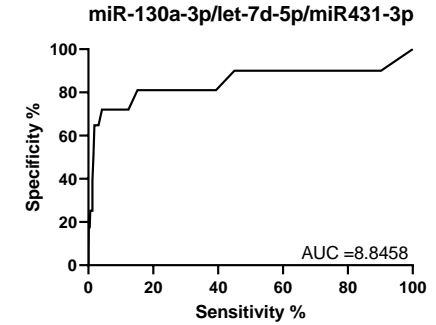

# Supplementary Figure 2

## hsa-mir-146a-5p

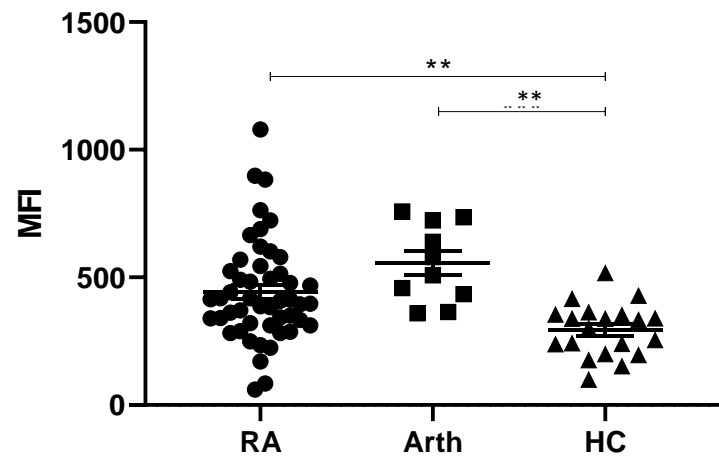

## hsa-mir-155-5p

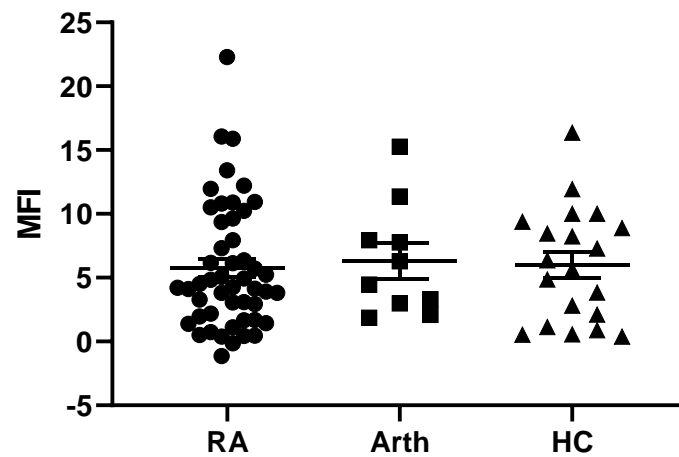

## hsa-mir-125a-5p

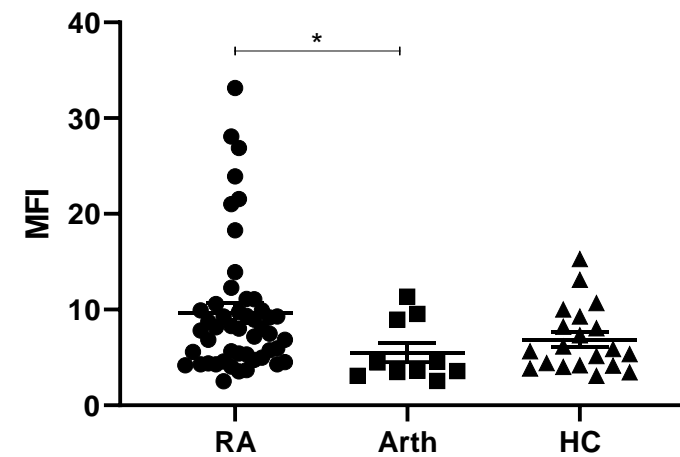

## hsa-mir-16-5p

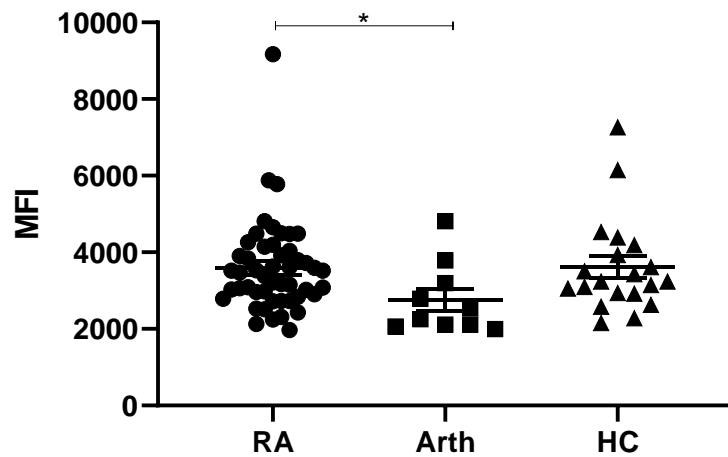

## hsa-mir-223-3p

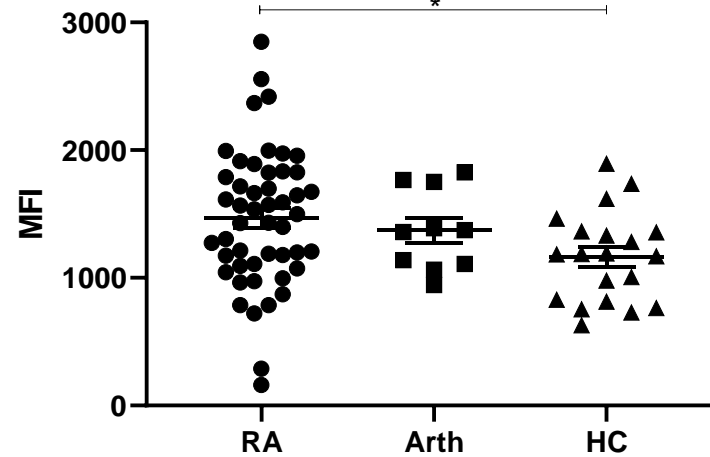

Supplement: DataSheet_1.pdf [file DataSheet_1.pdf]
