# Supplementary material for: Serum miRNA Signature in Rheumatoid Arthritis and “At-Risk Individuals”
Source: PubMed Central journal article supplement (PMC7966707; doi:10.3389/fimmu.2021.633201), 2021-03-03
Supplement: DataSheet_2.pdf [file DataSheet_2.pdf]

**Supplementary Table 1: Patient Baseline Clinical Parameters**

| <b>Demographics</b>  | <b>RA</b>         | <b>Arthralgia</b> | <b>HC</b> |
|----------------------|-------------------|-------------------|-----------|
| N=Number             | 49                | 10                | 20        |
| Age; mean, (range)   | 58 (27-83)        | 49 (27-68)        | 38(27-49) |
| Female/Male          | 36/13             | 8/2               | 13/7      |
| DAS28, mean $\pm$ SD | 4.42 $\pm$ 1.35   | 2.36 $\pm$ 1.03   | N/A       |
| VAS, mean $\pm$ SD   | 62.93 $\pm$ 27.67 | 55 $\pm$ 29.5     | N/A       |
| CRP, mean $\pm$ SD   | 23.55 $\pm$ 43.27 | 4.8 $\pm$ 3.8     | N/A       |
| ACPA pos/            | 25/24             | 10/10             | N/A       |

DAS28, Disease activity score; CRP, C-reactive protein; ESR, erythrocyte sedimentation rate; VAS; Visual Analogue scale of patient pain. ACPA-anti-citrullinated protein antibody.

**Supplementary Table 2: Patient Clinical Parameters Pre- and Post-MTX**

| <b>Demographics</b>        | <b>Pre-MTX<br/>N=18</b> | <b>Post-MTX<br/>N=18</b> |
|----------------------------|-------------------------|--------------------------|
| N=number                   | 18                      | 18                       |
| Age                        | 54 (27-75)              | 54(27-75)                |
| Female/Male                | 15/3                    | 15/3                     |
| DAS28, mean $\pm$ SD       | 4.43 $\pm$ 1.37         | 3.78 $\pm$ 1.34          |
| VAS, mean $\pm$ SD         | 58.46 $\pm$ 32.19       | 53.11 $\pm$ 29.12        |
| CRP, mean $\pm$ SD         | 26.97 $\pm$ 56.07       | 7.5 $\pm$ 10.84          |
| ACPA pos/neg               | 10/8                    | 10/8                     |
| Good response (number)     | N/A                     | 6                        |
| Moderate response (number) | N/A                     | 5                        |
| No response (number)       | N/A                     | 7                        |

DAS28, Disease activity score; CRP, C-reactive protein; ESR, erythrocyte sedimentation rate; VAS, Visual Analogue scale of patient pain. ACPA-anti-citrullinated protein antibody

**Supplementary Table 3. The Multiplex Circulating miRNA Immunology Fixed Panel**

| <b>miRbase 20 name</b> | <b>miRNA sequence</b>   |
|------------------------|-------------------------|
| hsa-let-7b-5p          | ugagguaguagguugugugguu  |
| hsa-let-7d-5p          | agagguaguagguugcauaguu  |
| hsa-let-7e-5p          | ugagguaggagguuguauaguu  |
| hsa-let-7g-5p          | ugagguaguaguuuuguacaguu |
| hsa-let-7i-5p          | ugagguaguaguuuugucuguu  |
| hsa-miR-10a-5p         | uaccugugauaccgaauuugug  |
| hsa-miR-122-5p         | uggagugugacaauugguuuug  |
| hsa-miR-1246           | aauggauuuuuggagcagg     |
| hsa-miR-125a-5p        | uccugagaccuuuaaccuguga  |
| hsa-miR-126-3p         | ucguaccgugaguaauaauugcg |
| hsa-miR-129-5p         | cuuuuugcggucugggcuugc   |
| hsa-miR-130a-3p        | cagugcaauguuaaaagggcgau |
| hsa-miR-132-3p         | uaacagucuacagccauggucg  |
| hsa-miR-140-3p         | uaccacaggguaagaaccacgg  |
| hsa-miR-142-3p         | cauaaaguagaaagcacuacu   |
| hsa-miR-145-5p         | guccaguuuuccaggaaucccu  |
| hsa-miR-146a-5p        | ugagaacugaaauccauggguu  |
| hsa-miR-150-5p         | ucuccaaccuuguaccagug    |
| hsa-miR-151a-5p        | ucgaggagcucacagucuagu   |
| hsa-miR-154-3p         | aaucauacacgguugaccuauu  |
| hsa-miR-155-5p         | uuauugcuaaucgugauaggggu |
| hsa-miR-15a-5p         | uagcagcacauaauugguuugug |
| hsa-miR-15b-5p         | uagcagcacaucaugguuuaca  |
| hsa-miR-16-5p          | uagcagcacguaaauauuggcg  |
| hsa-miR-16-2-3p        | ccaauuuacugugcugcuuuu   |
| hsa-miR-17-5p          | caaagugcuuacagugcagguag |
| hsa-miR-181a-5p        | aacauucaacgcugucggugagu |
| hsa-miR-181b-5p        | aacauucauugcugucggugggu |
| hsa-miR-185-5p         | uggagagaaaggcaguuccuga  |
| hsa-miR-192-5p         | cugaccuauugaauugacagcc  |
| hsa-miR-196a-5p        | uagguaguuucauguuugggg   |
| hsa-miR-200a-3p        | uaacacugucugguaacgaugu  |
| hsa-miR-203a           | gugaaauguuuaggaccacuag  |
| hsa-miR-205-5p         | uccuucuuuccaccggagucug  |
| hsa-miR-20a-5p         | uaaagugcuuauagugcagguag |
| hsa-miR-20b-5p         | caaagugcucauagugcagguag |
| hsa-miR-21-5p          | uagcuuaucauagugauguuga  |
| hsa-miR-210-3p         | cugugcgugugacagcggcuga  |
| hsa-miR-22-3p          | aagcugccaguugaagaacugu  |
| hsa-miR-221-3p         | agcuacauugucugcuggguuc  |
| hsa-miR-223-3p         | ugucaguuuugucaauacceca  |
| hsa-miR-23a-3p         | aucacauugccagggaauucc   |
| hsa-miR-24-3p          | uggcucaguucagcaggaacag  |
| hsa-miR-26a-5p         | uucaaguaauccaggauaggcu  |

|                 |                         |
|-----------------|-------------------------|
| hsa-miR-29a-3p  | uagcaccaucugaaaucggguua |
| hsa-miR-29b-3p  | uagcaccuuugaaaucaguguu  |
| hsa-miR-29c-3p  | uagcaccuuugaaaucggguua  |
| hsa-miR-30a-5p  | ugaccgauuucuccugguguuc  |
| hsa-miR-30b-5p  | uguaaacauccuacacucagcu  |
| hsa-miR-320a    | aaaagcuggguugagagggcga  |
| hsa-miR-320d    | aaaagcuggguugagagga     |
| hsa-miR-339-5p  | ucccuguccuccaggagcucacg |
| hsa-miR-33a-5p  | gugcauuguaguugcauugca   |
| hsa-miR-342-3p  | ucucacacagaaaucgcaccggu |
| hsa-miR-34a-5p  | uggcagugucuuaugcugguugu |
| hsa-miR-375     | uuuguucguucggcucgcguga  |
| hsa-miR-376b-3p | aucuagaggaaaauccauguu   |
| hsa-miR-422a    | acuggacuuaaggucagaaggc  |
| hsa-miR-429     | uaauacugucugguaaaaccgu  |
| hsa-miR-431-3p  | caggucgucuugcaggguucu   |
| hsa-miR-451a    | aaaccguuaccuuacugaguu   |
| hsa-miR-486-5p  | uccuguacugagcugccccgag  |
| hsa-miR-494-3p  | ugaaacauacacgggaaaccuc  |
| hsa-miR-523-5p  | cucuagagggaagcguuucug   |
| hsa-mir-744-5p  | ugcggggcuagggcuaacagca  |
| hsa-miR-885-5p  | uccauuacacuaccugccucu   |
| hsa-miR-92a-3p  | uauugcacuuguccggccugu   |
| hsa-mir-93-5p   | caaagugcuguucgucagguag  |
| x-control       | x-control               |
| blank           | none                    |
